# Supplementary material for: Trade-off between Responsiveness and Noise Suppression in Biomolecular System Responses to Environmental Cues
Source: PLoS Comput Biol. 2011 Jun 30;7(6):e1002091. doi: 10.1371/journal.pcbi.1002091 (PMC3127798; doi:10.1371/journal.pcbi.1002091)
Supplement: Table S1 — Equations defining the OLE network model. (DOC) [file pcbi.1002091.s014.doc]

**Table S1.** Equations defining the *OLE* network model.

| **Equation** | **Description** |
| --- | --- |
|  | Gene expression |
|  | Protein expression |
|  | Activation of Oaf1p by oleate (*o* denotes activated Oaf1p) |
|  | Heterodimerization of activated Oaf1p with Pip2p (*h*(t) represents the concentration of Oaf1p-Pip2p heterodimer) |
|  | Activation of Oaf3p by oleate |
|  | Activation of Adr1p by oleate |
|  | Activation of transcriptional response of *ADR1*, *OAF1*, and *OAF3* by oleate. |
|  | Fractional activity of *ADR1* gene |
|  | Fractional activity of *OAF1* gene |
|  | Fractional activity of *PIP2* gene |
|  | Fractional activity of *OAF3* gene |
|  | Fractional activity of *CTA1* gene |
