# Supplementary material for: Trade-off between Responsiveness and Noise Suppression in Biomolecular System Responses to Environmental Cues
Source: PLoS Comput Biol. 2011 Jun 30;7(6):e1002091. doi: 10.1371/journal.pcbi.1002091 (PMC3127798; doi:10.1371/journal.pcbi.1002091)
Supplement: Table S2 — Dynamic variables of the OLE network model. (DOC) [file pcbi.1002091.s015.doc]

**Table S2.** Dynamic variables of the *OLE* network model.

| **Symbol** | **Species** | **Initial condition (molec/cell)** |
| --- | --- | --- |
|  | Concentration of activated Oaf1p | calculated (Table S1) |
|  | Concentration of activated Adr1p | calculated (Table S1) |
|  | Concentration of activated Oaf3p | calculated (Table S1) |
|  | Oaf1p-Pip2p heterodimer concentration | calculated (Table S1) |
|  | Total concentration of Adr1p | (*rd,a/rd,a*)*pd,a*, (Table S3) |
|  | Total concentration of Cta1p | (*rd,c/rd,c*)*pd,c*, (Table S3) |
|  | Total concentration of Oaf1p | (*rd,o/rd,o*)*pd,o*, (Table S3) |
|  | Total concentration of Oaf3p | (*rd,y/rd,y*)*pd,y*, (Table S3) |
|  | Total concentration of Pip2p | (*rd,p/rd,p*)*pd,p*, (Table S3) |
|  | mRNA concentration of *ADR1* | 3.78*rd,a*,(Table S3) |
|  | mRNA concentration of *CTA1* | 11.5*rd,c*,(Table S3) |
|  | mRNA concentration of *OAF1* | 3.0*rd,o*,(Table S3) |
|  | mRNA concentration of *OAF3* | 3.43*rd,y*,(Table S3) |
|  | mRNA concentration of *PIP2* | 2.13*rd,a*,(Table S3) |
